# Supplementary material
Source: Springer Nature journal article supplement (https://www.springermedizin.de/resource/supplementary/12986_2005_58_MOESM3_ESM.pdf/25655362)

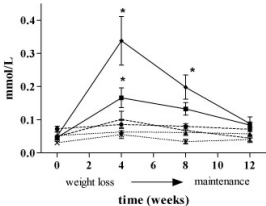

$\beta$ OH butyrate —●— vcarb    ...×... vlf    ...+... huf  
 acetoacetate —■— vcarb    ...▲... vlf    ...●... huf

Supplement: MOESM3 [file 25655362]
